# Supplementary material
Source: PubMed Central journal article supplement (PMC6538785)

Supplemental Figure 2

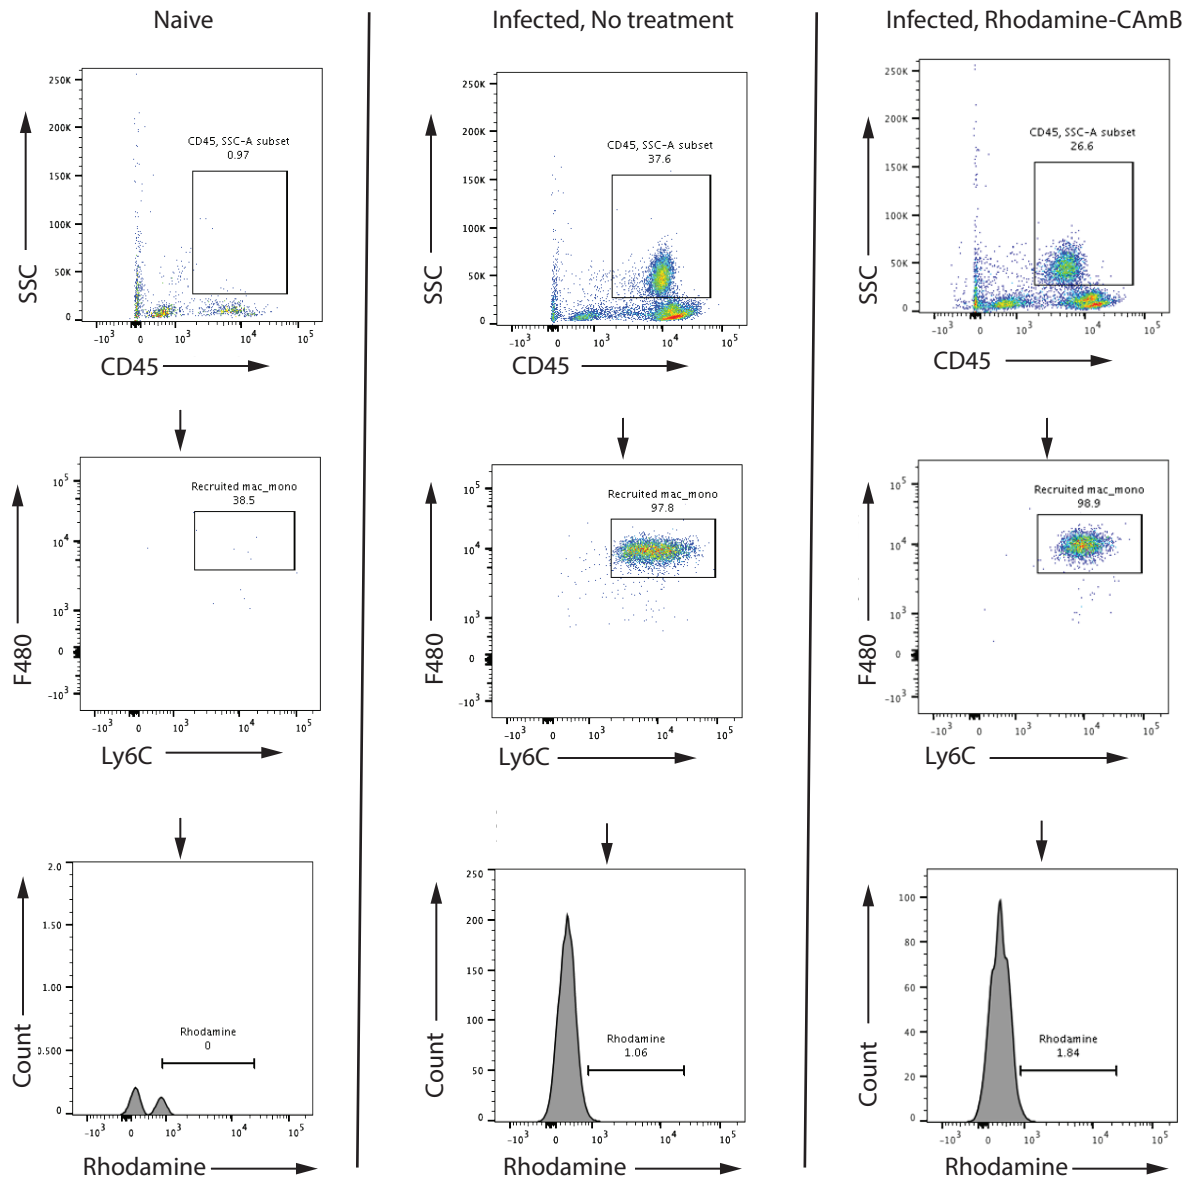

Rhodamine Fluorescence Detection

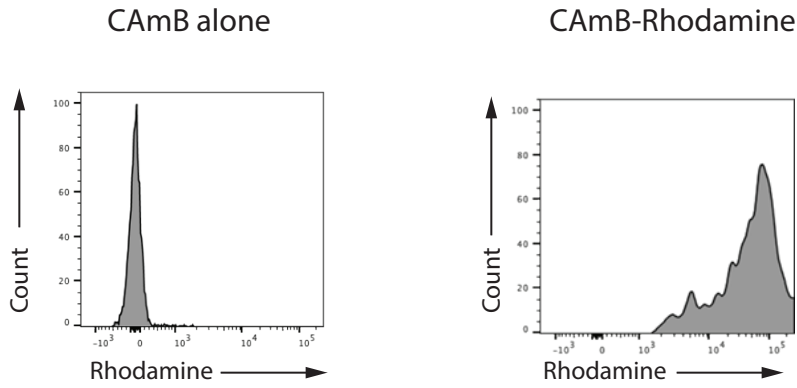

Supplement: mBio.00724-19-sf002.pdf [file mBio.00724-19-sf002.pdf]
